# Supplementary material for: Expression Pattern of HIF-1α and VEGF Supports Circumferential Application of Scatter Laser for Proliferative Sickle Retinopathy
Source: PubMed Central journal article supplement — Invest Ophthalmol Vis Sci. 2016 Dec;57(15):6739–46. doi: 10.1167/iovs.16-19513 (PMC5156513; doi:10.1167/iovs.16-19513), 2016-12
Supplement: iovs-57-15-13_s02.pdf [file iovs-57-15-13_s02.pdf]

## Supplementary Information

### Supplementary Figure Legends

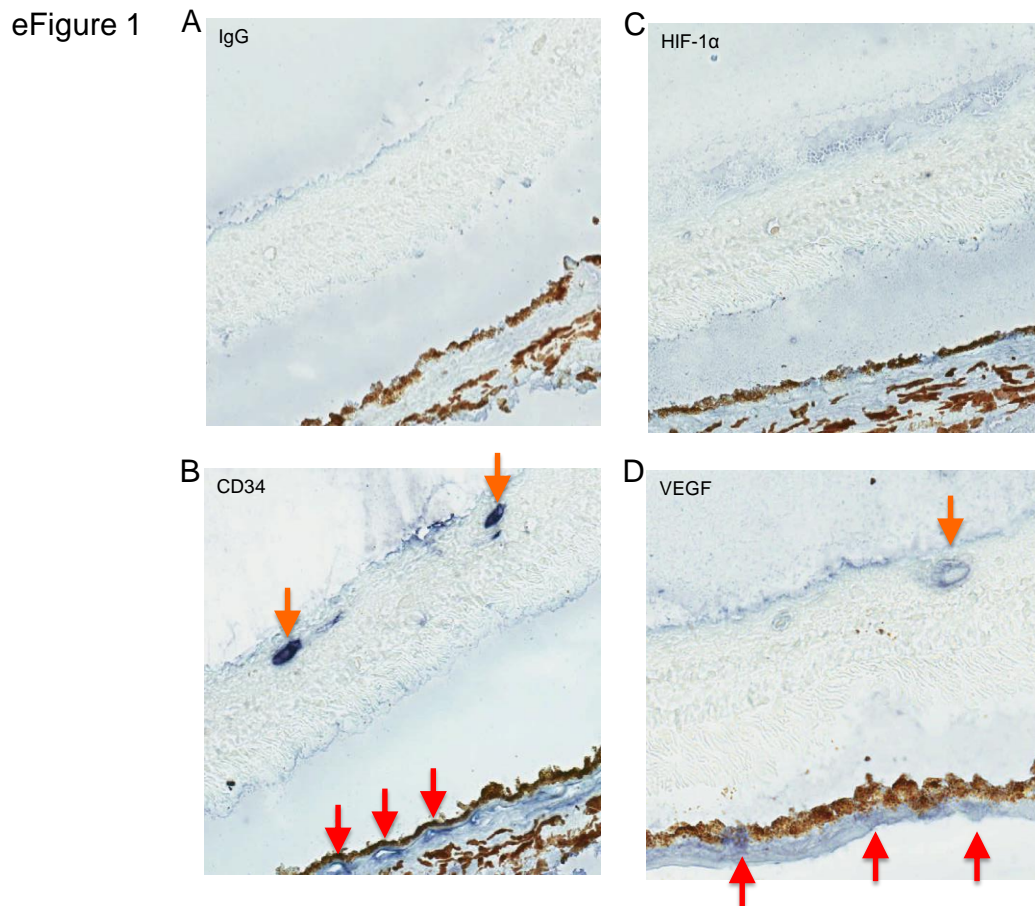

#### **eFigure 1: Expression of HIF-1 $\alpha$ and VEGF in control eyes.**

(A) Immunohistochemistry for IgG (negative control). (B) Expression of CD34 in vascular endothelial cells lining inner retinal vessels (orange arrows) and the choriocapillaris (red arrows) in a control patient without PSR. (C) No expression of HIF-1 $\alpha$  observed in a control patient without PSR. (D) Light expression of VEGF in vascular endothelial cells lining inner retinal vessels (orange arrows) and the choriocapillaris (red arrows) in a control patient without PSR. Similar results were obtained in 3/3 eyes of control patients without PSR, including one patient with sickle cell trait.
